# Supplementary material for: British Thoracic Society Guideline for oxygen use in adults in healthcare and emergency settings
Source: PubMed Central journal article supplement — BMJ Open Respir Res. 2017 May 15;4(1):e000170. doi: 10.1136/bmjresp-2016-000170 (PMC5531304; doi:10.1136/bmjresp-2016-000170), 2017-05-15
Supplement: bmjresp-2016-000170supp001.pdf [file bmjresp-2016-000170supp001.pdf]

## Appendix 1

### Guideline group members

| Name                                                             | Location    | Specialty                             | Representing                           |
|------------------------------------------------------------------|-------------|---------------------------------------|----------------------------------------|
| Dr Ronan O'Driscoll<br>Co-Chair<br>Organisation and chief Editor | Salford     | General/<br>Respiratory Medicine      | BTS                                    |
| Dr Luke Howard<br>Co-Chair<br>Academic                           | London      | Respiratory medicine                  | BTS                                    |
| Dr Vincent Mak<br>Co-Chair implementation                        | London      | Respiratory medicine                  | BTS                                    |
| Dr John Earis<br>Co-chair<br>Education                           | Liverpool   | Respiratory<br>medicine/<br>education | BTS                                    |
| Professor Anthony Davison                                        | Southend    | Respiratory medicine                  | Royal College of<br>Physicians, London |
| Professor Richard Beasley                                        | New Zealand | Respiratory medicine                  |                                        |
| Dr Duncan Powrie                                                 | Southend    | General/<br>Respiratory medicine      |                                        |
| Dr Louise Restrick                                               | London      | Respiratory Medicine                  |                                        |
| Dr Mervyn Singer                                                 | UCL         | Intensive Care<br>Medicine            |                                        |
| Professor Wisia Wedzicha                                         | London      | Respiratory medicine                  |                                        |
| Dr Jeff Keep                                                     | London      | Emergency Medicine                    | College of<br>Emergency<br>Medicine    |
| Dr Roop Kishen                                                   | Salford     | Intensive Care                        | Intensive Care<br>Society              |
| Dr Muhammed Asad Iqbal Khan                                      | Bury        | Acute Medicine                        | Society for Acute<br>Medicine          |
| Dr Meme Wijesinghe                                               | Truro       | Respiratory<br>consultant             |                                        |
| Dr Iain Small                                                    |             | Primary care                          | PCRS UK                                |
| Ms Carol Kelly                                                   | Ormskirk    | Nurse                                 | RCN/ARNS                               |
| Ms Lisa Ward                                                     | Southend    | Nurse                                 | ARNS                                   |
| Ms Leigh Mansfield                                               | Plymouth    | Physiotherapy                         | ACPRC/CSP                              |

|                           |                                |                         |                                                                 |
|---------------------------|--------------------------------|-------------------------|-----------------------------------------------------------------|
| Ms Angela Evans           | North Staffs                   | ARTP                    | ARTP                                                            |
| Dr Fiona Moore            | London                         | Ambulance service       | JRCALC                                                          |
| Mr David Whitmore         | London                         | Ambulance service       | College of Paramedics/LAS<br>Faculty of Pre-Hospital Care, RCSE |
| Dr Simon Gibbs            | London                         | Cardiology              | British Cardiovascular Society -                                |
| Dr Bruce Martin           | London                         | Anaesthesia             | Royal College of Anaesthetists                                  |
| Dr Kim Hinshaw            | London                         | Obstetrics              | Royal College of Obstetrics and Gynaecology                     |
| Dr Jasmeet Soar           |                                | Intensive Care Medicine | Resuscitation Council UK                                        |
| Professor Christine Roffe | Keele                          | Stroke medicine         | British Association of Stroke Physicians                        |
| Dr Robin Howard           |                                | Neurology               | Association of British Neurologists                             |
| Dr Alistair Dorward       | Glasgow                        | Respiratory             | Royal College of Physicians of Edinburgh                        |
| Dr Chris Dyer             |                                | Geriatrics              | British Geriatric Society                                       |
| Ms Clare Fitzpatrick      |                                | Midwifery               | Royal College of Midwives                                       |
| Mr Hasanin Khachi         | Barts and the London NHS Trust | Pharmacy                | Royal Pharmaceutical Society                                    |
| Dr Sabrina Bajwah         | King's College Hospital        | Palliative Medicine     | Association of Palliative Medicine                              |
| Dr Binita Kane            | Salford                        | ST                      |                                                                 |
| Dr Katrina Curtis         | Bristol                        | ST                      |                                                                 |
| Ms Lucy Falconer          |                                | Patient representative  |                                                                 |
